# Supplementary material for: Biowaste crab shell-extracted chitin nanofiber-based superior piezoelectric nanogenerator
Source: Royal Society of Chemistry journal article supplement (doi:10.1039/c8ta04074e), 2018-01-01
Supplement: c8ta04074e1.pdf [file c8ta04074e1.pdf]

## SUPPORTING INFORMATION

### **Bio-Waste Crab Shell extracted Chitin Nanofiber Based Superior Piezoelectric Nanogenerator**

*Nur Amin Hoque<sup>†</sup>, Pradip Thakur<sup>‡\*</sup>, Prosenjit Biswas<sup>†</sup>, Minarul Shaikh<sup>†, ‡, \*</sup>, Swagata Roy<sup>†</sup>, Biswajoy Bagchi<sup>§</sup>, Sukhen Das<sup>†\*</sup>, Partha Pratim Ray<sup>†\*</sup>*

*<sup>†</sup> Department of Physics, Jadavpur University, Kolkata- 700032, India*

*<sup>‡</sup> Department of Physics, Netaji Nagar College for Women, Kolkata- 700092, India.*

*<sup>\*</sup> Government General Degree College at Pedong, Kalimpong, Pin- 734311, India.*

*<sup>§</sup> Department of Medical Physics and Biomedical Engineering, University College London, London, United Kingdom.*

\*Corresponding author. E-mail address: [pradipthakurju@gmail.com](mailto:pradipthakurju@gmail.com) Mob: +919830366215

: [sdasphysics@gmail.com](mailto:sdasphysics@gmail.com) Mob: +919433091337

: [partha@phys.jdvu.ac.in](mailto:partha@phys.jdvu.ac.in) Ph. No: 033-2457-2844

## Supplementary Results and Discussions:

**The degree of crystallinity Calculation:** The degree of crystallinity ( $\alpha_c$ ) of the pure PVDF and PVDF composite films have been calculated by the formula  $\alpha_c = \Delta H_m / \Delta H_{100\%}$ , (where,  $\Delta H_m$  = the enthalpy of fusion of the samples and  $\Delta H_{100\%}$  = the enthalpy of fusion of 100% crystallite PVDF (104.6 J/g)). The enthalpy,  $\Delta H_m = 55.01$  J/g of the CNF/PVDF composite film. From the above equation we can calculate the degree of crystallinity ( $\alpha_c$ )= 52.9 which is much greater than pure PVDF film<sup>1</sup>.

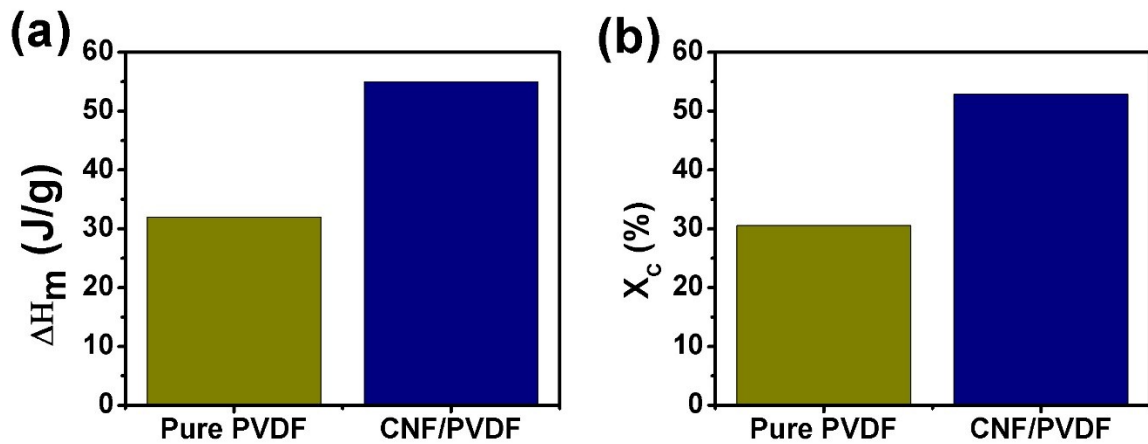

**Figure S1: (a) Enthalpy of pure PVDF and CNF/PVDF composite thin films. (b) Crystallinity of pure PVDF and CNF/PVDF composite thin films.**

**Table S1: Extracted piezoelectric coefficients and electrostriction coefficient.**

| Material | $P_r$<br>( $\mu\text{C}/\text{cm}^2$ ) | $Y$<br>( $\text{N}/\text{mm}^2$ ) | Frequency<br>(Hz) | $\epsilon_r$ | $d_{33}$<br>(pC/N)<br>( $d_{33} = -P_r/Y$ ) | $Q_{33}$ ( $\text{m}^4/\text{C}^2$ )<br>( $Q_{33} = d_{33}/2\epsilon_0\epsilon_r P_r$ ) |
|----------|----------------------------------------|-----------------------------------|-------------------|--------------|---------------------------------------------|-----------------------------------------------------------------------------------------|
| CNF      | 0.178                                  | 187.5                             | 50                | 321          | - 9.49                                      | 0.932                                                                                   |
| CNF/PVDF | 1.913                                  | 538                               | 50                | 101          | - 35.56                                     | 1.04                                                                                    |

### External Force (F) calculation:

The applied force on the PENG by the finger has been qualitatively estimated following two equations based on momentum and energy conservation law:

$$m \cdot g \cdot h = \frac{1}{2} m v^2$$

$$\text{i.e. } v = (2gh)^{1/2} \dots\dots\dots(1)$$

$$(F-mg).\Delta t = m.v.....(2)$$

Where,  $m$ ,  $v$ ,  $h$ ,  $F$  represent the mass of the imparted object i.e. finger, velocity of the object when it touches the PENG, falling height of the object and applied force respectively.  $g$  is acceleration due to gravity and  $\Delta t$  is the time duration between two successive positive or negative peak of the voltage vs time graph.

In present work  $m = 1.7$  kg,  $v = 1.384$  m/s,  $h = 0.15$  meter, and  $g = 9.8$  m/s<sup>2</sup>,  $\Delta t = 0.2167$  s

The estimated force of the finger impartation on the PENG be  $F = 27.5$  N.

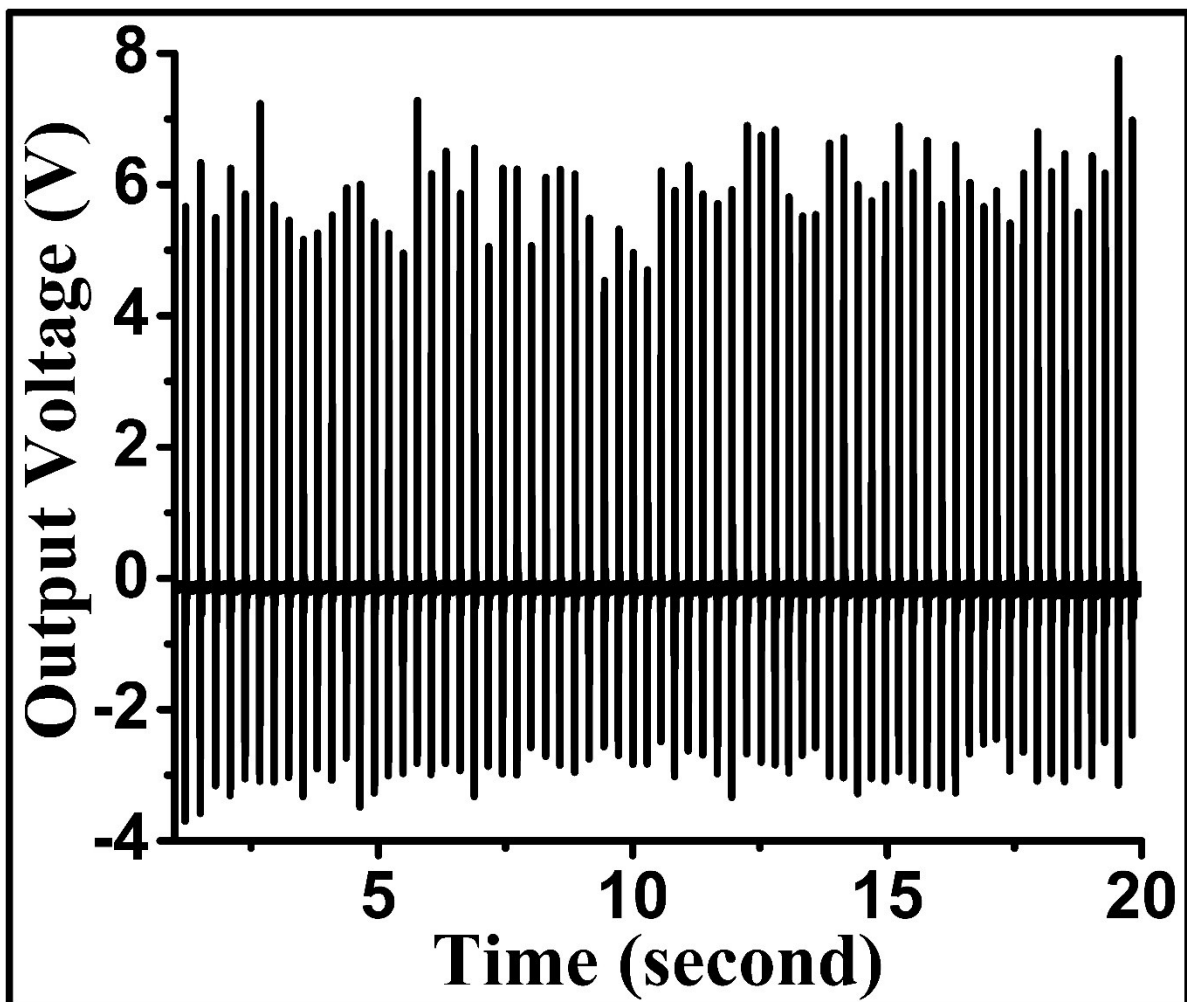

Figure S2: Open circuit output Voltage of pure PVDF thin film based piezoelectric nanogenerator.

Power density calculation:

The output performance i.e. power density has been computed from the following equation,

$$\text{Power density} = \frac{\text{Power (IV)}}{\text{operative volume of PENG}}$$

For CNF thin film,

$I_{sc} = 0.12 \mu\text{A}$ ,  $V_{oc} = 22 \text{ V}$

Power density =  $97 \mu\text{W}/\text{cm}^3$

Power density for PVDF/CNF thin film =  $6600 \mu\text{W}/\text{cm}^3$ , where  $I_{sc} = 1.913 \mu\text{A}$  and  $V_{oc} = 49 \text{ V}$ .

**Table S2:** Comparison of output performance and power density of the fabricated PENG with the previously reported bio based PENGs.

| Bio-materials based PENG                                                                                                                  | Force           | Open-circuit (Voc) voltage | Short-circuit (Isc) current | Power Density                    |
|-------------------------------------------------------------------------------------------------------------------------------------------|-----------------|----------------------------|-----------------------------|----------------------------------|
| Microfibre–nanowire hybrid structure for energy scavenging <sup>2</sup>                                                                   | Not supplied    | 3 mV                       | 4 nA                        | 76 mW/m <sup>2</sup>             |
| Flexible ZnO–Cellulose Nanocomposite for Multisource Energy Conversion <sup>3</sup>                                                       | Bath sonication | 0.08 V                     | 1.25 $\mu\text{A}$          | 0.12 $\mu\text{W}/\text{cm}^2$   |
| Virus-based piezoelectric energy generation <sup>4</sup>                                                                                  | 34 N            | 0.4 V                      | 6 nA                        | Not supplied                     |
| Flexible piezoelectric nanogenerators based on a fiber/ZnO nanowires/paper hybrid structure for energy harvesting <sup>5</sup>            | Not supplied    | 17 mV                      | 0.40-0.52 nA                | 0.0002 $\mu\text{W}/\text{cm}^2$ |
| Bioinspired piezoelectric nanogenerators based on vertically aligned phage nanopillars <sup>6</sup>                                       | 30 N            | 140.8 mV                   | 9.5 nA                      | 0.3 nW                           |
| Novel Piezoelectric Paper-Based Flexible Nanogenerators Composed of BaTiO <sub>3</sub> Nanoparticles and Bacterial Cellulose <sup>7</sup> | 0.1 MPa         | 14 V                       | 1.14 $\mu\text{A}$          | 0.64 $\mu\text{W cm}^{-2}$       |

|                                                                                                                                           |          |        |             |                               |
|-------------------------------------------------------------------------------------------------------------------------------------------|----------|--------|-------------|-------------------------------|
| Enhanced electromechanical behavior of cellulose film by zinc oxide nanocoating and its vibration energy harvesting <sup>8</sup>          | 14 N     | 500 mV | 1.5 $\mu$ A | 0.36 $\mu$ W/cm <sup>2</sup>  |
| High-performance bio-piezoelectric nanogenerator made with fish scale <sup>9</sup>                                                        | 0.17 MPa | 4 V    | 1.5 $\mu$ A |                               |
| Efficient natural piezoelectric nanogenerator: Electricity generation from fish swim bladder <sup>10</sup>                                | ~1.4MPa  | 10 V   | 51 nA       | 0.23 $\mu$ W/cm <sup>2</sup>  |
| Bio-assembled, piezoelectric prawn shell made self-powered wearable sensor for non-invasive physiological signal monitoring <sup>11</sup> | 5.2 kPa  | 4 V    | 1 nA        | 0.041 $\mu$ W/cm <sup>2</sup> |
| Bio-waste onion skin as an innovative nature-driven piezoelectric material with high energy conversion efficiency <sup>12</sup>           | 34 kPa   | 18 V   | 166 nA      | 1.7 $\mu$ W/cm <sup>2</sup>   |
| <b>Present work</b>                                                                                                                       | 27.5 N   | 49 V   | 1.9 $\mu$ A | 6600 $\mu$ W/cm <sup>3</sup>  |

## References:

- 1 N. A. Hoque, P. Thakur, S. Roy, A. Kool, B. Bagchi, P. Biswas, M. M. Saikh, F. Khatun, S. Das, P. P. Ray, *ACS Appl. Mater. Interfaces* 9 (2017) 23048–23059.
- 2 Y. Qin, X. Wang, Z. L. Wang, *nat.* 451(14) (2008) 809-13
- 3 A. Kumar, H. Gullapalli, K. Balakrishnan , A. B. –M., R. Vajtai, M. Terrones, P. M. Ajayan, *small* 7(15) 2011 2173–2178.
- 4 B. Y. Lee, J. Zhang, C. Zueger, W.-J. Chung, S. Y. Yoo, E. Wang, J. Meyer, R. Ramesh, S. –W. Lee, *Nat. Nanotechnol.* 7 (2012) 351-356.
- 5 Q. Liao, Z. Zhang, X. Zhang, M. Mohr, Y. Zhang, H. –J. Fecht, *Nano Res.* 7(6) (2014) 917–928.
- 6 D. -M. Shin, H. J. Han, W. –G. Kim, E. Kim, C. Kim, S. W. Hong, H. K. Kim, J. –W. Oh, Y. –H. Hwang, *Energy Environ. Sci.*, 8 (2015) 3198-3203.
- 7 G. Zhang , Q. Liao , Z. Zhang , Q. Liang , Y. Zhao , X. Zheng, Y. Zhang, *Adv. Sci.*3 (2016) 1500257.
- 8 S. Mun, H.-U. Ko, L. Zhai, S. –K. Min, H. –C. Kim, J. Kim, *Acta Materialia* 114 (2016) 1-6.
- 9 S. K. Ghosh, D. Mandal, *Appl. Phys. Lett.* 109 (2016) 103701- 05.
- 10 S. K. Ghosh, D. Mandal, *Nano Energy* 28 (2016) 356–365.
- 11 S. K. Ghosh, D. Mandal, *Appl. Phys. Lett.* 110 (2017) 123701
- 12 S. Maiti, S. K. Karan, J. Leea, A. K. Mishra, B. B. Khatua, J. K. Kim, *Nano Energy* 42 (2017) 282–293.
